# Supplementary material
Source: MDPI journal article supplement (https://www.mdpi.com/2311-7524/10/1/24)
Supplement: s1 [file s1]

## Supplementary Materials

**Table S1.** Medium composition used for somatic embryogenesis of elite Indonesian cacao. DKW= Driver and Kuniyuki (1984); MS= Murashige and Skoog; 2,4-D= 2,4-Dichlorophenoxyacetic acid; 2,4,5-T= 2,4,5-Tricholophenoxyacetic acid.

| Ingredients            | Primary Embryogenesis |                     | Secondary Embryogenesis |            |
|------------------------|-----------------------|---------------------|-------------------------|------------|
|                        | Induction (IND1)      | Expression (INDexp) | Induction (CM2)         | Expression |
| DKW basal (g)          | 5.585                 | 5.585               | -                       | -          |
| MS macro (g)           | -                     | -                   | 1.652                   | 1.652      |
| MS micro (g)           | -                     | -                   | -                       | -          |
| DKW micro 100X (ml)    | -                     | -                   | 10                      | 10         |
| DKW vitamins 100X (ml) | 1                     | 1                   | 1                       | 1          |
| Amino acids 1000X (ml) | 1                     | 1                   | 1                       | -          |
| 2,4-D (mg/L)           | 2                     | -                   | -                       | -          |
| 2,4,5-T (mg/L)         | -                     | -                   | 1                       | -          |
| Kinetin (mg/L)         | 0,25                  | -                   | -                       | -          |
| Proline (mg/L)         | -                     | -                   | 1                       | -          |
| Adenine (mg/L)         | -                     | -                   | 0.25                    | -          |
| Glucose (g/L)          | 30                    | 30                  | 30                      | -          |
| Sucrose (g/L)          | -                     | -                   | -                       | 40         |
| pH                     | 5,8                   | 5,8                 | 5,8                     | 5,8        |
| Gelrite (g/L)          | 3 g                   | 3 g                 | 3 g                     | 3 g        |

**Table S2.** Induction of primary somatic embryo on petal and staminode explants on modified IND media with different concentration of 2,4-D on the percentage of callus-producing embryos, the number of callus-producing embryos, and total embryos. Embryogenic response was determined after 8 weeks of culture on INDexp media.

| Clones | Explant   | 2,4-D<br>(mg L <sup>-1</sup> ) | Average of calluses<br>Producing SEs (%) | Number<br>of<br>calluses<br>producing SEs | Total number SEs       |
|--------|-----------|--------------------------------|------------------------------------------|-------------------------------------------|------------------------|
| SUL1   | Petal     | 1                              | 0c ± 0                                   | 0                                         | 0                      |
|        | Staminode |                                | 3,3 c ± 4,7                              | 1                                         | 5                      |
|        | Petal     | 2                              | 0 bc ± 0                                 | 0                                         | 0                      |
|        | Staminode |                                | 6,7 b ± 4,7                              | 2                                         | 14                     |
| SUL2   | Petal     | 1                              | 10 bc ± 8,1                              | 3                                         | Browning               |
|        | Staminode |                                | 16,67 ab ± 4,7                           | 5                                         | 13                     |
|        | Petal     | 2                              | 13.3 abc ± 4,7                           | 4                                         | 17 direct SE, browning |
|        | Staminode |                                | 23.3 a ± 4,7                             | 6                                         | 24                     |

Data are the means of three replications, ± standard deviation. Mean within columns with the same letter are not significantly different at  $p < 0,05$  according to the Tukey B multiple range test (one way ANOVA).

**Table S3.** Percentage of milky, translucent, and abnormal secondary embryos during the maintenance phase of secondary embryogenic calluses.

| Explant   | Treatment                                              | Total<br>Number<br>SSEs | Percentage<br>Milky<br>SSEs<br>(%) | Percentage<br>Translucent<br>SSEs<br>(%) | Percentage<br>Abnormal<br>SSEs<br>(%) |
|-----------|--------------------------------------------------------|-------------------------|------------------------------------|------------------------------------------|---------------------------------------|
| Cotyledon | 1 mgL <sup>-1</sup> 2,4,5-T                            | 77                      | 54.5                               | 32.5                                     | 13.0                                  |
|           | 1 mgL <sup>-1</sup> 2,4,5-T+1mgL <sup>-1</sup> proline | 202                     | 67.8                               | 21.8                                     | 10.4                                  |
|           | 1 mgL <sup>-1</sup> 2,4,5-T+2mgL <sup>-1</sup> proline | 117                     | 60.7                               | 27.4                                     | 15.4                                  |
| Hypocotyl | 1 mgL <sup>-1</sup> 2,4,5-T                            | 18                      | 44.4                               | 38.9                                     | 16.67                                 |
|           | 1 mgL <sup>-1</sup> 2,4,5-T+1mgL <sup>-1</sup> proline | 31                      | 51.6                               | 29.0                                     | 19.35                                 |
|           | 1 mgL <sup>-1</sup> 2,4,5-T+2mgL <sup>-1</sup> proline | 24                      | 50.0                               | 29.2                                     | 20.83                                 |
